# Supplementary material
Source: MDPI journal article supplement (https://www.mdpi.com/2813-446X/1/1/2)
Supplement: s1 [file s1]

## Sheet: Microwave
From A. Honig, M. Mandel, M. L. Stitch, C. H. Townes, Phys. Rev., 96, 629-642 (1954)
J=9→10,10→11, and 11→12
	m	uncertainty	nat ab (%)	nuc spin
133Cs	132.905	2.4e-08	100	3.5
79Br	78.9183	2.1e-06	50.69	1.5
81Br	80.9163	2.1e-06	49.31	1.5
	49.516
	50.2952
First, plot the data to see what we are dealing with.
MHz	uncertainty
21218.7	0.2	1
21254.4	0.1	1
21292.4	0.2	1
21366.4	0.2	1
21440.7	0.2	1
21514.5	0.2	1
21588.7	0.1	1
23061.4	0.2	1
23098	0.2	1
23140.6	0.2	1
23178.2	0.2	1
23220.2	0.2	1
23259.2	0.2	1
23299.8	0.2	1
23340.3	0.2	1
23379.5	0.1	1
23503	0.2	1
23583.9	0.2	1
23665.6	0.2	1
23747.2	0.1	1
25504.7	0.1	1
25550.2	0.2	1
25649	0.2	1
25816.5	0.2	1
It appears that there are three clusters, but lets confirm using cluster analysis.
	Model1	dev	dev^2		Model2	dev1	dev2	devmin		Model3	dev1	dev2	dev3	devmin		Model4	dev1	dev2	dev3	dev4	devmin
21218.7	23153	-1934.38	3.74181e+06		21382.2	26758.9	7.09438e+06	26758.9		21382.2	26758.9	4.51864e+06	1.94608e+07	26758.9		21382.2	26758.9	4.00412e+06	5.78998e+06	1.94608e+07	26758.9
21254.4	23153	-1898.6	3.60467e+06		21382.2	16333.2	6.90505e+06	16333.2		21382.2	16333.2	4.3678e+06	1.91464e+07	16333.2		21382.2	16333.2	3.8622e+06	5.61907e+06	1.91464e+07	16333.2
21292.4	23153	-1860.64	3.46197e+06		21382.2	8071.48	6.707e+06	8071.48		21382.2	8071.48	4.21057e+06	1.88156e+07	8071.48		21382.2	8071.48	3.71444e+06	5.44054e+06	1.88156e+07	8071.48
21366.4	23153	-1786.68	3.19221e+06		21382.2	252.22	6.32939e+06	252.22		21382.2	252.22	3.91252e+06	1.81795e+07	252.22		21382.2	252.22	3.43483e+06	5.10099e+06	1.81795e+07	252.22
21440.7	23153	-1712.39	2.93227e+06		21382.2	3411.56	5.9611e+06	3411.56		21382.2	3411.56	3.62414e+06	1.75515e+07	3411.56		21382.2	3411.56	3.16498e+06	4.77094e+06	1.75515e+07	3411.56
21514.5	23153	-1638.56	2.68487e+06		21382.2	17487	5.60604e+06	17487		21382.2	17487	3.34849e+06	1.69383e+07	17487		21382.2	17487	2.90774e+06	4.45386e+06	1.69383e+07	17487
21588.7	23153	-1564.34	2.44715e+06		21382.2	42625.1	5.26008e+06	42625.1		21382.2	42625.1	3.08237e+06	1.63329e+07	42625.1		21382.2	42625.1	2.66012e+06	4.1461e+06	1.63329e+07	42625.1
23061.4	23153	-91.6562	8400.87		23882.2	2.81951e+06	673724	673724		23344.4	2.81951e+06	80082.5	6.59831e+06	80082.5		23219.7	2.81951e+06	25061.7	317552	6.59831e+06	25061.7
23098	23153	-55.0662	3032.29		23882.2	2.94372e+06	614996	614996		23344.4	2.94372e+06	60712.2	6.41167e+06	60712.2		23219.7	2.94372e+06	14815.5	277653	6.41167e+06	14815.5
23140.6	23153	-12.4263	154.412		23882.2	3.09186e+06	549937	549937		23344.4	3.09186e+06	41517.5	6.19755e+06	41517.5		23219.7	3.09186e+06	6253.47	234534	6.19755e+06	6253.47
23178.2	23153	25.2137	635.733		23882.2	3.22565e+06	495527	495527		23344.4	3.22565e+06	27595.3	6.01156e+06	27595.3		23219.7	3.22565e+06	1717.18	199494	6.01156e+06	1717.18
23220.2	23153	67.1838	4513.66		23882.2	3.37817e+06	438200	438200		23344.4	3.37817e+06	15412.8	5.80751e+06	15412.8		23219.7	3.37817e+06	0.282079	163764	5.80751e+06	0.282079
23259.2	23153	106.154	11268.6		23882.2	3.52294e+06	388125	388125		23344.4	3.52294e+06	7255.37	5.6212e+06	7255.37		23219.7	3.52294e+06	1560.34	133742	5.6212e+06	1560.34
23299.8	23153	146.754	21536.7		23882.2	3.67699e+06	339186	339186		23344.4	3.67699e+06	1987.24	5.43033e+06	1987.24		23219.7	3.67699e+06	6416.19	105695	5.43033e+06	6416.19
23340.3	23153	187.224	35052.7		23882.2	3.83384e+06	293685	293685		23344.4	3.83384e+06	16.8795	5.24336e+06	16.8795		23219.7	3.83384e+06	14537.4	81018.5	5.24336e+06	14537.4
23379.5	23153	226.494	51299.4		23882.2	3.98916e+06	252664	252664		23344.4	3.98916e+06	1236.33	5.06505e+06	1236.33		23219.7	3.98916e+06	25549.2	60205.2	5.06505e+06	25549.2
23503	23153	349.914	122440		23882.2	4.4974e+06	143821	143821		23344.4	4.4974e+06	25148.1	4.52476e+06	25148.1		23624.9	4.4974e+06	80236.9	14871.2	4.52476e+06	14871.2
23583.9	23153	430.834	185618		23882.2	4.84717e+06	88993.1	88993.1		23344.4	4.84717e+06	57361	4.18705e+06	57361		23624.9	4.84717e+06	132628	1683.26	4.18705e+06	1683.26
23665.6	23153	512.564	262722		23882.2	5.21373e+06	46910	46910		23344.4	5.21373e+06	103190	3.85925e+06	103190		23624.9	5.21373e+06	198837	1656.69	3.85925e+06	1656.69
23747.2	23153	594.134	352995		23882.2	5.59289e+06	18229.6	18229.6		23344.4	5.59289e+06	162249	3.54542e+06	162249		23624.9	5.59289e+06	278236	14950.6	3.54542e+06	14950.6
25504.7	23153	2351.65	5.53028e+06		23882.2	1.69946e+07	2.63252e+06	2.63252e+06		25630.1	1.69946e+07	4.66699e+06	15727	15727		25630.1	1.69946e+07	5.22123e+06	3.53362e+06	15727	15727
25550.2	23153	2397.18	5.74649e+06		23882.2	1.7372e+07	2.78233e+06	2.78233e+06		25630.1	1.7372e+07	4.86578e+06	6380.42	6380.42		25630.1	1.7372e+07	5.43138e+06	3.70687e+06	6380.42	6380.42
25649	23153	2495.91	6.22959e+06		23882.2	1.82048e+07	3.12145e+06	3.12145e+06		25630.1	1.82048e+07	5.3111e+06	355.417	355.417		25630.1	1.82048e+07	5.90131e+06	4.09679e+06	355.417	355.417
25816.5	23153	2663.49	7.0942e+06		23882.2	1.96629e+07	3.74168e+06	3.74168e+06		25630.1	1.96629e+07	6.11158e+06	34757.1	34757.1		25630.1	1.96629e+07	6.74358e+06	4.80325e+06	34757.1	34757.1
	23153		4.77252e+07			21382.2	23882.2	1.67369e+07			21382.2	23344.4	25630.1	755924			21382.2	23219.7	23624.9	25630.1	301232
											1962.13	2285.73
Let's plot all of the cluster averages.
21218.7	0
21254.4	0
21292.4	0
21366.4	0
21440.7	0
21514.5	0
21588.7	0
23061.4	0
23098	0
23140.6	0
23178.2	0
23220.2	0
23259.2	0
23299.8	0
23340.3	0
23379.5	0
23503	0
23583.9	0
23665.6	0
23747.2	0
25504.7	0
25550.2	0
25649	0
25816.5	0
23153	1			error	error1/2
21382.2	2		1	4.77252e+07	6908.34
23882.2	2		2	1.67369e+07	4091.08
21382.2	3		3	755924	869.439
23344.4	3		4	301232	548.846
25630.1	3
21382.2	4
23219.7	4
23624.9	4
25630.1	4
Now let's assign the J.
		"J+1"						est freq	2B
21382.2	2123.93	10.0673						21200	2158.47	2285.73
23344.4		10.9911						23320	2069.36	1962.13
25630.1		12.0673						25440
									2113.91	2123.93
	J	J+1	2B
21218.7	9	10	2121.87	0	1	1.2
21254.4	9	10	2125.44	0	2	2.2
21292.4	9	10	2129.24	0	1	1.2
21366.4	9	10	2136.64	0	1	1.2
21440.7	9	10	2144.07	0	1	1.2
21514.5	9	10	2151.45	0	1	1.2
21588.7	9	10	2158.87	0	1	1.2
23061.4	10	11	2096.49	0	2	2.4
23098	10	11	2099.82	0	1	1.4
23140.6	10	11	2103.69	0	2	2.4
23178.2	10	11	2107.11	0	1	1.4
23220.2	10	11	2110.93	0	2	2.4
23259.2	10	11	2114.47	0	1	1.4
23299.8	10	11	2118.16	0	2	2.4
23340.3	10	11	2121.84	0	1	1.4
23379.5	10	11	2125.41	0	2	2.4
23503	10	11	2136.63	0	1	1.4
23583.9	10	11	2143.99	0	1	1.4
23665.6	10	11	2151.42	0	1	1.4
23747.2	10	11	2158.83	0	1	1.4
25504.7	11	12	2125.39	0	2	2.6
25550.2	11	12	2129.18	0	1	1.6
25649	11	12	2137.41	0	1	1.6
25816.5	11	12	2151.38	0	1	1.6
Looks like an overlay of at least two different vibrational progressions. Let's separate them.
	v	Species	Model1	Model2	dev1	dev2	dev1^2	dev2^2	devmin
2121.87	5	1	2121.92	2089.24	-0.0513872	32.6303	0.00264065	1064.73	0.00264065
2125.44	0	2	2158.85	2125.41	-33.4099	0.0344174	1116.22	0.00118455	0.00118455
2129.24	4	1	2129.3	2096.47	-0.064686	32.7695	0.00418428	1073.84	0.00418428
2136.64	3	1	2136.69	2103.71	-0.0559847	32.9307	0.00313429	1084.43	0.00313429
2144.07	2	1	2144.08	2110.94	-0.0142835	33.125	0.000204018	1097.26	0.000204018
2151.45	1	1	2151.47	2118.17	-0.0185822	33.2732	0.000345299	1107.1	0.000345299
2158.87	0	1	2158.85	2125.41	0.016119	33.4604	0.000259823	1119.6	0.000259823
2096.49	4	2	2129.3	2096.47	-32.8156	0.0185882	1076.86	0.000345519	0.000345519
2099.82	8	1	2099.76	2067.53	0.0599635	32.284	0.00359563	1042.26	0.00359563
2103.69	3	2	2136.69	2103.71	-33.0002	-0.0134545	1089.01	0.000181025	0.000181025
2107.11	7	1	2107.14	2074.77	-0.0291534	32.3474	0.00084992	1046.36	0.00084992
2110.93	2	2	2144.08	2110.94	-33.1502	-0.0109518	1098.94	0.000119942	0.000119942
2114.47	6	1	2114.53	2082	-0.0582703	32.4709	0.00339543	1054.36	0.00339543
2118.16	1	2	2151.47	2118.17	-33.3039	-0.0120854	1109.15	0.000146057	0.000146057
2121.84	5	1	2121.92	2089.24	-0.0755691	32.6061	0.00571068	1063.16	0.00571068
2125.41	0	2	2158.85	2125.41	-33.4421	0.00223554	1118.37	4.99763e-06	4.99763e-06
2136.63	3	1	2136.69	2103.71	-0.0601665	32.9265	0.00362001	1084.16	0.00362001
2143.99	2	1	2144.08	2110.94	-0.0911017	33.0481	0.00829951	1092.18	0.00829951
2151.42	1	1	2151.47	2118.17	-0.0484004	33.2434	0.0023426	1105.12	0.0023426
2158.83	0	1	2158.85	2125.41	-0.0202446	33.4241	0.000409844	1117.17	0.000409844
2125.39	0	2	2158.85	2125.41	-33.463	-0.0187493	1119.78	0.000351537	0.000351537
2129.18	4	1	2129.3	2096.47	-0.119686	32.7145	0.0143247	1070.24	0.0143247
2137.41	3	1	2136.69	2103.71	0.720515	33.7072	0.519142	1136.18	0.519142
2151.38	1	1	2151.47	2118.17	-0.0890822	33.2027	0.00793564	1102.42	0.00793564
									0.582728
2Be			2162.55	2129.03							1.01574
2αe			7.3873	7.23477
Model for Species 1
Species1				Model1				Corrected	Model1a				Model2				Model3				Model4
21218.7	9	10	5	21219.3	-0.593642	0.352411		21218.7	21218.7	-0.0446587	0.0019944		21218.4	0.218885	0.0479108		21219	-0.364804	0.133082		21218.7	-0.0751846	0.00565273
21292.4	9	10	4	21293.1	-0.726	0.527076		21292.4	21292.5	-0.147663	0.0218043		21292.2	0.212633	0.0452126		21292.9	-0.465506	0.216695		21292.5	-0.0869448	0.0075594
21366.4	9	10	3	21367	-0.638358	0.407501		21366.4	21366.4	-0.0306671	0.00094047		21366.1	0.296311	0.0878004		21366.7	-0.346207	0.119859		21366.4	0.00127716	1.63114e-06
21440.7	9	10	2	21440.9	-0.220716	0.0487155		21440.7	21440.2	0.416329	0.17333		21440.1	0.579921	0.336309		21440.5	0.103092	0.0106279		21440.4	0.299481	0.0896891
21514.5	9	10	1	21514.7	-0.263074	0.0692079		21514.5	21514.1	0.403325	0.162671		21514.2	0.273462	0.0747816		21514.4	0.0923903	0.00853597		21514.5	0.0176677	0.000312147
21588.7	9	10	0	21588.6	0.0845682	0.00715178		21588.7	21587.9	0.78032	0.6089		21588.5	0.226935	0.0514993		21588.2	0.471689	0.22249		21588.7	0.00583622	3.40614e-05
23098	10	11	8	23097.4	0.569775	0.324643		23098	23096.9	1.07679	1.15948		23097.8	0.188954	0.0357035		23096.9	1.05886	1.12119		23097.7	0.242235	0.058678
23178.2	10	11	7	23178.7	-0.409819	0.167951		23178.2	23178.1	0.129485	0.0167663		23178.5	-0.222697	0.0495941		23178.1	0.114093	0.0130172		23178.5	-0.208642	0.0435315
23259.2	10	11	6	23259.9	-0.729413	0.532043		23259.2	23259.3	-0.15782	0.0249071		23259.3	-0.117424	0.0137884		23259.4	-0.170678	0.0291311		23259.3	-0.131539	0.0173025
23340.3	10	11	5	23341.2	-0.919006	0.844573		23340.3	23340.6	-0.315125	0.0993035		23340.3	-0.0252262	0.000636361		23340.6	-0.32545	0.105918		23340.3	-0.0564556	0.00318723
23503	10	11	3	23503.7	-0.748194	0.559794		23503	23503	-0.0797338	0.00635748		23502.7	0.279942	0.0783677		23503	-0.0849931	0.00722382		23502.7	0.247652	0.0613317
23583.9	10	11	2	23585	-1.08779	1.18328		23583.9	23584.3	-0.387038	0.149799		23584.1	-0.207087	0.0428849		23584.3	-0.389765	0.151916		23584.1	-0.223323	0.0498732
23665.6	10	11	1	23666.2	-0.617381	0.38116		23665.6	23665.5	0.115657	0.0133765		23665.6	-0.0271916	0.000739381		23665.5	0.115464	0.0133319		23665.6	-0.016318	0.000266277
23747.2	10	11	0	23747.5	-0.306975	0.0942337		23747.2	23746.7	0.458352	0.210087		23747.3	-0.150372	0.0226117		23746.7	0.460692	0.212237		23747.3	-0.101333	0.0102683
25550.2	11	12	4	25551.8	-1.5312	2.34457		25550.2	25551.1	-0.837195	0.700896		25550.6	-0.404841	0.163896		25550.5	-0.297851	0.0887154		25550.2	0.0228555	0.000522374
25649	11	12	3	25640.4	8.55197	73.1362		25639	25639.7	-0.718801	0.516674		25639.3	-0.326426	0.106554		25639.1	-0.176693	0.0312204		25638.8	0.106722	0.0113896
25816.5	11	12	1	25817.7	-1.16169	1.34952		25816.5	25816.9	-0.362011	0.131052		25817	-0.517845	0.268164		25816.3	0.185624	0.0344562		25816.6	-0.0376095	0.00141447
						82.33					3.99833				1.42645				2.51965				0.361014
Be				1081.28					1081.24				1081.28				1081.28				1081.31
αe				3.69362					3.69215				3.71983				3.69204				3.71759
γe													0.00325172								0.00300045
De																	-1.61517e-07				-1.38087e-07
Model for Species 2
Species2
21254.4	9	10	0	21254.1	0.370067	0.13695							21254.1	0.312743	0.0978084		21254.3	0.137578	0.0189277		21254.4	0.047395	0.00224629
23061.4	10	11	4	23061.2	0.194976	0.0380155							23061.3	0.0301954	0.000911761		23061.2	0.212041	0.0449614		23061.4	0.0237929	0.000566103
23140.6	10	11	3	23140.8	-0.148	0.0219039							23140.7	-0.0783257	0.00613491		23140.8	-0.148	0.021904		23140.7	-0.067655	0.00457719
23220.2	10	11	2	23220.3	-0.110975	0.0123155							23220.2	0.0538044	0.00289491		23220.3	-0.128041	0.0163945		23220.2	0.0602071	0.0036249
23299.8	10	11	1	23299.9	-0.113951	0.0129847							23299.8	0.00658552	4.3369e-05		23299.9	-0.148082	0.0219283		23299.8	-0.0126209	0.000159287
23379.5	10	11	0	23379.5	0.0530739	0.00281684							23379.5	-0.00998223	9.9645e-05		23379.5	0.00187696	3.523e-06		23379.6	-0.076139	0.00579715
25504.7	11	12	0	25504.9	-0.193919	0.0376047							25505	-0.262708	0.0690154		25504.6	0.0780394	0.00609016		25504.7	0.0268841	0.000722754
						0.262591									0.176908				0.13021				0.0176937
Be				1064.51									1064.52				1064.54				1064.55
αe				3.61695									3.63163				3.61773				3.63474
γe													0.00316702								0.00365205
De																	-9.66458e-08				-1.06656e-07
Compare Be ratio to reduced mass ratio to assign Species 1 and 2 to particular isotopologues
Be ratio				1.01575					1.01572				1.01575				1.01573				1.01574
μ ratio				1.01574					1.01574				1.01574				1.01574				1.01574
αe ratio				1.0212					1.02079				1.02429
What do the deviations look like? The bad point at 25648.95 MHz is clearly an outlier here (Species 1 Model 1).
